# Supplementary material
Source: publisher figshare collection journal article supplement (https://geolsoc.figshare.com/ndownloader/files/5426462)
Supplement: Supplementary file 1 [file 5426462]

Table 2: Summary of SHRIMP U-Pb zircon data for the granite sample D-9,,,,,,,,,,,,,,,,,
,,,,,,,,,,,,,,,,,
,,,,,,,,,,,,,,,,,
 Grain.Spot,"(1)
%
206Pbc","ppm
U","ppm
Th","232Th
/238U","ppm
206Pb*","(1)
206Pb
/238U
Age",,"(1)
207Pb
/206Pb
Age",,"%
Dis-
cor-
dant","(1)
207Pb*
/206Pb*",±%,"(1)
207Pb*
/235U",±%,"(1)
206Pb*
/238U",±%,"err
corr"
1.1,0.12,548,370,0.70,297  ,"3,151",±52,"3,535.0",± 4.1,11 ,0.31285,0.27,27.19,2.1,0.630 ,2.1,.992
2.1,0.09,276,245,0.92,177  ,"3,589",±59,"3,583.8",± 5.0,0 ,0.3229 ,0.33,33.17,2.2,0.745 ,2.2,.989
3.1,0.26,127,87,0.71, 79.7,"3,523",±63,"3,584  ",±11  ,2 ,0.3229 ,0.73,32.37,2.4,0.727 ,2.3,.954
4.1,0.31,279,170,0.63,161  ,"3,297",±56,"3,561.4",± 5.7,7 ,0.3183 ,0.37,29.30,2.2,0.668 ,2.2,.986
5.1,6.05,527,197,0.39,225  ,"2,389",±44,"3,463  ",±14  ,31 ,0.2987 ,0.86,18.47,2.3,0.4487,2.1,.921
7.1,0.37,187,175,0.97,118  ,"3,539",±60,"3,577.8",± 6.6,1 ,0.3217 ,0.43,32.44,2.2,0.732 ,2.2,.982
8.1,0.85,612,299,0.50,300  ,"2,874",±49,"3,519.7",± 4.9,18 ,0.30979,0.31,24.00,2.1,0.562 ,2.1,.989
9.1,2.72,928,709,0.79,267  ,"1,797",±33,"3,134  ",±17  ,43 ,0.2422 ,1.0 ,10.73,2.3,0.3215,2.1,.893
10.1,0.24,462,207,0.46,272  ,"3,350",±56,"3,547.1",± 5.9,6 ,0.3153 ,0.38,29.63,2.2,0.682 ,2.1,.984
11.1,0.08,321,253,0.82,214  ,"3,702",±60,"3,596.5",± 4.5,-3 ,0.32561,0.29,34.84,2.2,0.776 ,2.1,.991
12.1,0.68,596,356,0.62,299  ,"2,935",±49,"3,533.4",± 4.3,17 ,0.31253,0.28,24.84,2.1,0.577 ,2.1,.991
13.1,0.10,192,136,0.73,124  ,"3,608",±61,"3,584.5",± 6.3,-1 ,0.3231 ,0.41,33.41,2.2,0.750 ,2.2,.983
14.1,0.16,455,189,0.43,290  ,"3,569",±58,"3,575.5",± 3.9,0 ,0.32119,0.25,32.75,2.1,0.739 ,2.1,.993
15.1,0.24,317,258,0.84,199  ,"3,535",±58,"3,590.6",± 6.5,2 ,0.3244 ,0.43,32.67,2.2,0.730 ,2.1,.981
16.1,0.08,376,310,0.85,239  ,"3,565",±58,"3,587.9",± 4.2,1 ,0.32380,0.27,32.97,2.1,0.738 ,2.1,.992
17.1,0.55,428,348,0.84,247  ,"3,293",±54,"3,530.6",± 4.6,7 ,0.31197,0.30,28.67,2.1,0.667 ,2.1,.990
18.1,1.76,468,350,0.77,235  ,"2,902",±57,"3,490.9",± 5.8,17 ,0.3041 ,0.37,23.84,2.4,0.569 ,2.4,.988
"   Errors are 1-sigma; Pbc and Pb* indicate the common and radiogenic portions, respectively.",,,,,,,,,,,,,,,,,
   Error in Standard calibration was 0.98% ( ot included in above errors but required when comparing data from different mounts).,,,,,,,,,,,,,,,,,
   (1) Common Pb corrected using measured 204Pb.,,,,,,,,,,,,,,,,,
